# Supplementary material for: Serum Metabolomic Analysis of Synchronous Estrus in Yaks Based on UPLC-Q-TOF MS Technology
Source: MDPI journal article supplement (doi:10.3390/ani14101399), 2024-05-07
Supplement: s1 [file s1]

Table S1. Differential metabolites between GnRH and IO

| Metabolite Name                            | Adduct type              | m/z       | VIP      | FC          | P.value     |
|--------------------------------------------|--------------------------|-----------|----------|-------------|-------------|
| (E)-2-Decylpent-2-Enedioic Acid            | [M-H]-                   | 269.17639 | 1.17645  | 0.563506624 | 0.00173309  |
| 18Alpha-Glycyrrhetic Acid                  | [M+ACN+H]+               | 471.37787 | 1.3213   | 2.809077362 | 0.05902639  |
| 3,5-Dihydroxydecanoic Acid                 | [2M+H]+                  | 227.1257  | 4.23751  | 0.73300174  | 0.001707581 |
| 3-Hydroxyproline                           | [M-H]-                   | 130.0513  | 1.53887  | 0.600161382 | 0.039752088 |
| 6-Ethoxy-2-Mercaptobenzothiazole           | [M+H]+                   | 212.01976 | 1.27832  | 0.621045534 | 0.022872871 |
| Acacetin                                   | [M-H]-                   | 283.05191 | 1.00192  | 0.686931659 | 0.004529941 |
| Acetylcarnitine                            | [M]+                     | 204.12233 | 2.81019  | 0.776055658 | 0.162263058 |
| Acetylcholine                              | [M]+                     | 146.11629 | 2.31988  | 0.778526005 | 0.009948536 |
| Alpha-Hydroxydeoxycholic Acid              | [M-H]-                   | 391.30646 | 1.15619  | 0.317307109 | 0.003923365 |
| Auranticin A                               | [M-H]-                   | 439.22455 | 1.06097  | 2.299493938 | 4.43195E-07 |
| Betaine                                    | [M+H]+                   | 118.08525 | 6.24555  | 1.192893972 | 0.052109384 |
| Bonactin                                   | [M-H]-                   | 399.2775  | 1.22819  | 0.315608428 | 0.022468258 |
| But-3-Enylglucosinolate                    | [M-H]-                   | 409.98663 | 1.15401  | 0.678336622 | 0.023494538 |
| Butyryl Carnitine                          | [M+H]+                   | 232.15199 | 1.32376  | 0.709205431 | 0.042908972 |
| Caffeic Acid                               | [M-H]-                   | 179.03621 | 1.78844  | 0.475248194 | 0.032962228 |
| Capsanthone                                | [M+H]+                   | 582.42419 | 1.81824  | 1.293111182 | 0.026481774 |
| Chenodeoxycholic Acid                      | [M+H-2H <sub>2</sub> O]+ | 357.2775  | 1.48462  | 0.274921018 | 0.003322601 |
| Cholesterol                                | [M+H]+                   | 409.36502 | 1.7321   | 0.38453055  | 6.79652E-05 |
| Cholic Acid                                | [M+NH <sub>4</sub> ]+    | 426.32022 | 9.83524  | 0.372028411 | 0.007941917 |
| Cochlioquinone A                           | [M-H]-                   | 531.30127 | 1.15803  | 0.37697049  | 0.048958096 |
| Creatinine                                 | [M+H]+                   | 114.06633 | 8.19833  | 0.784616691 | 0.00974309  |
| Dehydrorotenone                            | [M-H]-                   | 391.22449 | 1.40835  | 1.71152947  | 2.82963E-05 |
| Deoxycholic Acid                           | [M-H]-                   | 391.28625 | 4.25864  | 0.308883693 | 0.001130748 |
| Deoxysappanone B 7,4'-Dimethyl Ether       | [M-H]-                   | 313.19858 | 1.12738  | 0.510116959 | 0.033514089 |
| Dimethyl Sulfoxide                         | [M+H]+                   | 79.02022  | 1.21463  | 1.329978091 | 0.110013789 |
| Ergosterol Acetate                         | [M-H]-                   | 465.35959 | 1.68772  | 0.399888041 | 8.03627E-05 |
| Eriodictyol 7,3'-Dimethyl Ether            | [2M-H]-                  | 315.08151 | 2.17636  | 0.600458748 | 0.02086942  |
| Eupafolin                                  | [M+H]+                   | 317.05515 | 1.45889  | 0.436738577 | 0.000509594 |
| Gaultherin                                 | [M+H]+                   | 153.06854 | 1.2227   | 0.09767635  | 0.006185389 |
| Glutamate Conjugated Chenodeoxycholic Acid | [M+H]+                   | 544.33789 | 4.90127  | 1.421102741 | 0.020814285 |
| Isocurcumenol                              | [2M+H]+                  | 235.16641 | 3.31886  | 1.569865775 | 0.042130702 |
| Isorhynchophylline                         | [M-H]-                   | 383.21198 | 1.01594  | 0.498031182 | 0.036245225 |
| Khasianine                                 | [M+H]+                   | 722.41974 | 1.4381   | 0.471008446 | 0.000660121 |
| Lactic Acid                                | [M-H]-                   | 89.02409  | 14.9425  | 0.50289405  | 0.026671514 |
| Lichesterylic Acid                         | [M-H]-                   | 297.24158 | 0.975147 | 2.051963549 | 0.077317431 |
| LPC 16:0                                   | [M+H]+                   | 496.33737 | 18.4839  | 1.622153613 | 0.000167346 |
| LPC 18:1                                   | [M+H]+                   | 522.35468 | 9.68404  | 1.179701764 | 0.024204257 |
| LPE 18:2                                   | [M-H]-                   | 476.27679 | 3.82294  | 0.663593136 | 0.023702205 |
| Microcolin A                               | [M+H]+                   | 770.56348 | 1.37865  | 0.456611805 | 0.010958611 |
| Microcolin H                               | [M+ACN+H]+               | 756.55359 | 2.03718  | 0.606774172 | 0.047148072 |
| Miltirone                                  | [M+Na]+                  | 305.15814 | 3.20148  | 1.639737575 | 0.070670782 |
| Nervonic Acid                              | [M+H-H <sub>2</sub> O]+  | 389.34183 | 3.67376  | 0.226589784 | 5.98775E-05 |
| N-Isovaleroylglycine                       | [M-H]-                   | 158.08304 | 2.20756  | 0.334055419 | 0.048811359 |
| Octadecanedioic Acid                       | [M-H]-                   | 313.24176 | 3.07539  | 0.750232526 | 0.016197635 |
| Olmestartan                                | [M-H]-                   | 445.19513 | 1.58445  | 0.296380884 | 0.036180914 |
| Orlistat                                   | [M+K]+                   | 534.35376 | 1.06125  | 1.650967371 | 0.008795113 |
| Pelletierine Hydrochloride                 | [M-H]-                   | 176.09242 | 1.42062  | 1.464323172 | 0.076351602 |

|                                     |                         |           |          |             |             |
|-------------------------------------|-------------------------|-----------|----------|-------------|-------------|
| PFCA-Perfluoroalkyl                 | [M+Hac-H]-              | 156.99089 | 2.38158  | 0.897826541 | 0.007798167 |
| Phenylacetylglutamine               | [M+H]+                  | 265.11752 | 3.10892  | 0.271694208 | 0.107812105 |
| Phenylacetyl glycine                | [M-H]-                  | 192.06772 | 4.8509   | 5.177660809 | 0.02125045  |
| Phosphatidylcholine Alkenyl 16      | [M-H]-                  | 820.5741  | 1.07825  | 0.200363987 | 9.33006E-05 |
| Phosphatidylcholine Lyso 17         | [M-H <sub>2</sub> O-H]- | 538.35059 | 1.99647  | 1.541090529 | 0.000947462 |
| Phosphatidylethanolamine Alkenyl 18 | [M-H]-                  | 770.53583 | 1.1383   | 0.510488727 | 0.006591784 |
| Phosphatidylethanolamine Lyso 20    | [M-H]-                  | 506.32013 | 1.10215  | 1.149230557 | 0.119252424 |
| Phthalamic Acid                     | [M-H]-                  | 164.03537 | 1.04963  | 2.454596573 | 0.058021732 |
| Pomiferin                           | [M-H]-                  | 419.25467 | 1.33401  | 2.095870307 | 0.000437503 |
| Prenyletin                          | [M-H]-                  | 245.01244 | 1.0459   | 0.703027397 | 0.033979067 |
| Pseudobaptigenin                    | [M-H]-                  | 281.05371 | 1.56717  | 0.752595345 | 0.010819425 |
| Putative Analogue Of Akanthomycin   | [M+NH <sub>4</sub> ]+   | 372.2211  | 1.1775   | 2.257423475 | 0.094727954 |
| Ramipril                            | [M-H]-                  | 415.22592 | 2.02145  | 2.17978263  | 6.64314E-05 |
| Roccellic Acid                      | [M-H]-                  | 299.22153 | 1.0969   | 0.752646265 | 0.015680933 |
| Secopenitrem D                      | [M+H]+                  | 570.35138 | 2.85694  | 1.65837448  | 0.046061291 |
| Sn-Glycero-3-Phosphocholine         | [M]+                    | 258.10913 | 0.974209 | 1.487694801 | 0.0457497   |
| Sophoridine                         | [M+H]+                  | 271.16507 | 1.32192  | 0.00458436  | 0.030284269 |
| Sparteine Sulfate                   | [M+H]+                  | 371.17068 | 1.47045  | 0.366600678 | 0.000426175 |
| Spheroidenone                       | [M+H]+                  | 582.42798 | 1.53647  | 1.955088447 | 1.29422E-05 |
| Tetracosanoic Acid                  | [M+H]+                  | 391.35513 | 1.71432  | 0.316605267 | 5.15835E-05 |
| Trigonelline                        | [M+H]+                  | 138.05437 | 1.44357  | 0.241843415 | 0.022141034 |
| Tryptamine                          | [M-H]-                  | 159.10263 | 1.31715  | 2.025817239 | 0.089337459 |
| Veratrosine                         | [M+H]+                  | 572.36774 | 3.31156  | 1.832375402 | 0.005061895 |

**Table S2.** Differential metabolites between NE and IO

| Metabolite Name                      | Adduct type           | m/z       | VIP     | FC          | P.value     |
|--------------------------------------|-----------------------|-----------|---------|-------------|-------------|
| 2',4',6'-Trihydroxydihydrochalcone   | [M-H]-                | 257.07785 | 1.09657 | 1.432448088 | 0.017652991 |
| 2'-Deoxycytidine                     | [M-H]-                | 226.08363 | 1.08111 | 1.655157951 | 0.029338332 |
| 2-Oxobutyric Acid                    | [M-H]-                | 101.02357 | 1.07544 | 0.735013101 | 0.01290469  |
| 3-Hydroxyproline                     | [M-H]-                | 130.0513  | 1.67789 | 1.936905018 | 0.009613794 |
| 3'-Methoxy-4',5,7-Trihydroxyflavonol | [M-H]-                | 315.0426  | 2.34783 | 8.600921268 | 0.007974719 |
| 4-Methylumbelliferyl Sulfate         | [M-H]-                | 254.98244 | 2.29331 | 2.011295357 | 0.001428997 |
| 9-Fluorenone                         | [M-H]-                | 179.05605 | 8.89641 | 0.680377614 | 0.061539165 |
| 9-Trans-Palmitelaidic Acid           | [M-H]-                | 253.2178  | 1.43718 | 0.321023698 | 0.003379803 |
| Acetylcarnitine                      | [M]+                  | 204.12233 | 3.00822 | 1.349982207 | 0.089993349 |
| Auranticin A                         | [M-H]-                | 439.22455 | 1.16294 | 0.379822691 | 1.76623E-10 |
| Azelaic Acid                         | [M-H]-                | 187.10043 | 1.38222 | 2.109201597 | 0.032995287 |
| But-3-Enylglucosinolate              | [M-H]-                | 409.98663 | 1.82169 | 2.275658699 | 4.70352E-05 |
| Butyryl Carnitine                    | [M+H]+                | 232.15199 | 1.38128 | 1.441834348 | 0.010022187 |
| Caffeic Acid                         | [M-H]-                | 179.03621 | 1.48022 | 1.797562084 | 0.04899322  |
| Capsanthone                          | [M+H]+                | 582.42419 | 1.51219 | 0.80161816  | 0.013670871 |
| Cholesterol                          | [M+H]+                | 409.36502 | 1.27815 | 2.003576308 | 0.006238506 |
| Cholic Acid                          | [M+NH <sub>4</sub> ]+ | 426.32022 | 8.50355 | 2.357191974 | 0.055074518 |
| Choline                              | [M]+                  | 104.10622 | 2.91115 | 0.760411858 | 0.041855765 |
| Citrate                              | [M-H]-                | 191.02019 | 1.70875 | 1.968959255 | 0.017188862 |
| Cortisone                            | [M-H]-                | 359.19113 | 1.62946 | 0.42779568  | 0.045249186 |
| Dehydrorotenone                      | [M-H]-                | 391.22449 | 1.38674 | 0.564132967 | 2.2029E-07  |
| Deoxysappanone B 7,4'-Dimethyl Ether | [M-H]-                | 313.19858 | 1.2683  | 2.220760317 | 0.010998864 |
| Dl-Beta-Hydroxybutyric Acid          | [M-H]-                | 103.03825 | 1.44951 | 8.092587012 | 0.023875471 |
| Erucamide                            | [M+H]+                | 338.34198 | 1.7099  | 1.65767815  | 0.012226516 |
| Eupafolin                            | [M+H]+                | 317.05515 | 1.36068 | 2.238675615 | 0.000257118 |

|                                            |                         |           |          |             |             |
|--------------------------------------------|-------------------------|-----------|----------|-------------|-------------|
| Feruloyl Lactate                           | [M-H]-                  | 281.05698 | 1.17012  | 4.629722891 | 0.015480737 |
| FT-Thioether                               | [M-H]-                  | 187.00737 | 18.9503  | 0.750025069 | 0.028996479 |
| Glutamate Conjugated Chenodeoxycholic Acid | [M+H]+                  | 544.33789 | 4.68546  | 0.755268225 | 0.002695119 |
| Glycocholic Acid                           | [M-H]-                  | 464.30408 | 13.5178  | 1.915459788 | 0.034859063 |
| Glycolithocholic Acid                      | [M-H]-                  | 432.31284 | 1.19674  | 2.099627574 | 0.051485056 |
| Glycoursodeoxycholic Acid                  | [M-H]-                  | 448.3067  | 9.68418  | 1.814610018 | 0.038362659 |
| Hippurate                                  | [M-H]-                  | 178.05156 | 13.066   | 34.58032266 | 0.016710656 |
| Indole + 1O, 1Carboxy, O-Hex               | [M-H]-                  | 338.08844 | 1.62597  | 0.614235544 | 0.010259613 |
| Khasianine                                 | [M+H]+                  | 722.41974 | 1.32373  | 2.330205622 | 0.040887492 |
| Lichesterylic Acid                         | [M-H]-                  | 297.24158 | 1.08842  | 0.509771199 | 0.003220299 |
| LPC 16:0                                   | [M+H]+                  | 496.33737 | 18.9033  | 0.584910742 | 3.34179E-06 |
| LPC 18:1                                   | [M+H]+                  | 522.35468 | 12.2923  | 0.759416579 | 0.012167852 |
| LPE 18:2                                   | [M-H]-                  | 476.27679 | 3.24919  | 1.445103353 | 0.03326406  |
| Microcolin A                               | [M+H]+                  | 770.56348 | 1.39294  | 2.134090713 | 0.001174046 |
| Microcolin H                               | [M+ACN+H]+              | 756.55359 | 2.46689  | 1.862910742 | 0.002545635 |
| N,N-Dimethylaniline                        | [M+H]+                  | 122.09663 | 2.68128  | 1.26435312  | 0.000767318 |
| N-Cinnamoylglycine                         | [M-H]-                  | 204.0681  | 1.23525  | 2.290133116 | 0.012617405 |
| Nervonic Acid                              | [M+H-H <sub>2</sub> O]+ | 389.34183 | 3.04349  | 3.254895792 | 0.000793915 |
| N-Isovaleroylglycine                       | [M-H]-                  | 158.08304 | 2.59226  | 7.042039778 | 0.004603745 |
| Oleic Acid                                 | [M-H]-                  | 281.24979 | 2.54948  | 0.349758918 | 0.004933513 |
| Olmesartan                                 | [M-H]-                  | 445.19513 | 1.51035  | 2.916996341 | 0.033604461 |
| Palmitic Acid                              | [M-H]-                  | 255.23274 | 2.44984  | 0.66670518  | 0.011330389 |
| Pannaric Acid                              | [M-H]-                  | 315.04172 | 5.57587  | 1.870756988 | 0.003941044 |
| PE(16:0/10-Hdohe)                          | [M-H]-                  | 778.51788 | 1.11322  | 1.335164231 | 0.004587117 |
| PE(18:0/10-Hdohe)                          | [M-H]-                  | 806.55182 | 1.3528   | 1.462743516 | 7.34828E-05 |
| PE(18:0/11,12-Epete)                       | [M-H]-                  | 780.51837 | 1.25379  | 1.474511312 | 4.32284E-05 |
| PFCA-Perfluoroalkyl                        | [M+Hac-H]-              | 156.99089 | 2.39412  | 1.128412324 | 0.00133699  |
| Phosphatidylcholine Lyso 17                | [M-H <sub>2</sub> O-H]- | 538.35059 | 2.00212  | 0.634475621 | 0.000154307 |
| Phosphatidylethanolamine 18                | [M-H]-                  | 792.5343  | 3.14733  | 1.273450014 | 0.007737449 |
| Phosphatidylethanolamine 20                | [M-H]-                  | 818.54993 | 2.43413  | 1.323475852 | 6.91948E-05 |
| Phosphatidylethanolamine Alkenyl 18        | [M-H]-                  | 770.53583 | 1.24111  | 2.666307341 | 0.000797376 |
| Phosphatidylethanolamine Lyso 17           | [M-H]-                  | 466.29688 | 0.968115 | 0.736565031 | 0.003295424 |
| Phosphatidylethanolamine Lyso 20           | [M-H]-                  | 506.32013 | 1.07814  | 0.861694519 | 0.082798742 |
| Phosphatidylinositol 18                    | [M-H]-                  | 885.5473  | 1.02243  | 4.427262533 | 4.24131E-06 |
| Phthalamic Acid                            | [M-H]-                  | 164.03537 | 1.24846  | 0.401463395 | 0.001697966 |
| Pomiferin                                  | [M-H]-                  | 419.25467 | 1.10235  | 0.552845851 | 2.00096E-05 |
| Pseudobaptigenin                           | [M-H]-                  | 281.05371 | 1.01379  | 1.206731115 | 0.045044774 |
| Pyroglutamic Acid                          | [M-H]-                  | 128.0361  | 3.44397  | 0.69743175  | 0.013457297 |
| Ramipril                                   | [M-H]-                  | 415.22592 | 2.18831  | 0.394873789 | 6.74855E-08 |
| Secopenitrem D                             | [M+H]+                  | 570.35138 | 3.03624  | 0.685400372 | 0.000154821 |
| Sodium Deoxycholate                        | [M+NH <sub>4</sub> ]+   | 393.28513 | 4.75611  | 1.238406647 | 0.006761715 |
| Sparteine Sulfate                          | [M+H]+                  | 371.17068 | 1.14058  | 2.143954917 | 0.003153934 |
| Spheroidenone                              | [M+H]+                  | 582.42798 | 1.23513  | 0.544839286 | 0.000151174 |
| Stearic Acid                               | [M-H]-                  | 283.26547 | 1.63921  | 0.774951251 | 0.054176671 |
| Taurolithocholic Acid                      | [M-H]-                  | 482.29489 | 3.42098  | 1.933386961 | 0.083489536 |
| Tetracosanoic Acid                         | [M+H]+                  | 391.35513 | 1.16672  | 2.080095486 | 0.011870374 |
| Thymidine-5'-Monophosphate                 | [M-H]-                  | 321.04547 | 0.909258 | 1.274268503 | 0.072169103 |
| Trans-Vaccenic Acid                        | [M-H]-                  | 281.24796 | 4.07203  | 0.402237922 | 0.001643081 |
| Urea                                       | [M+H]+                  | 61.03944  | 3.46049  | 0.843386935 | 0.045511915 |
| Uric Acid                                  | [M+Hac-H]-              | 167.02126 | 1.13189  | 0.487280804 | 0.00024725  |

|             |                    |           |         |             |             |
|-------------|--------------------|-----------|---------|-------------|-------------|
| Veratrosine | [M+H] <sup>+</sup> | 572.36774 | 2.14495 | 0.706671232 | 0.008927247 |
| Villol      | [M-H] <sup>-</sup> | 441.12433 | 1.02941 | 0.507677282 | 0.00130513  |

---
